# Supplementary material for: Viral modulation of type II interferon increases T cell adhesion and virus spread
Source: PubMed Central journal article supplement — bioRxiv. 2023 May 26:2023.05.26.542397. Preprint. [Version 1] doi: 10.1101/2023.05.26.542397 (PMC10246016; doi:10.1101/2023.05.26.542397), 2023-05-26

# Supplementary Figure 1

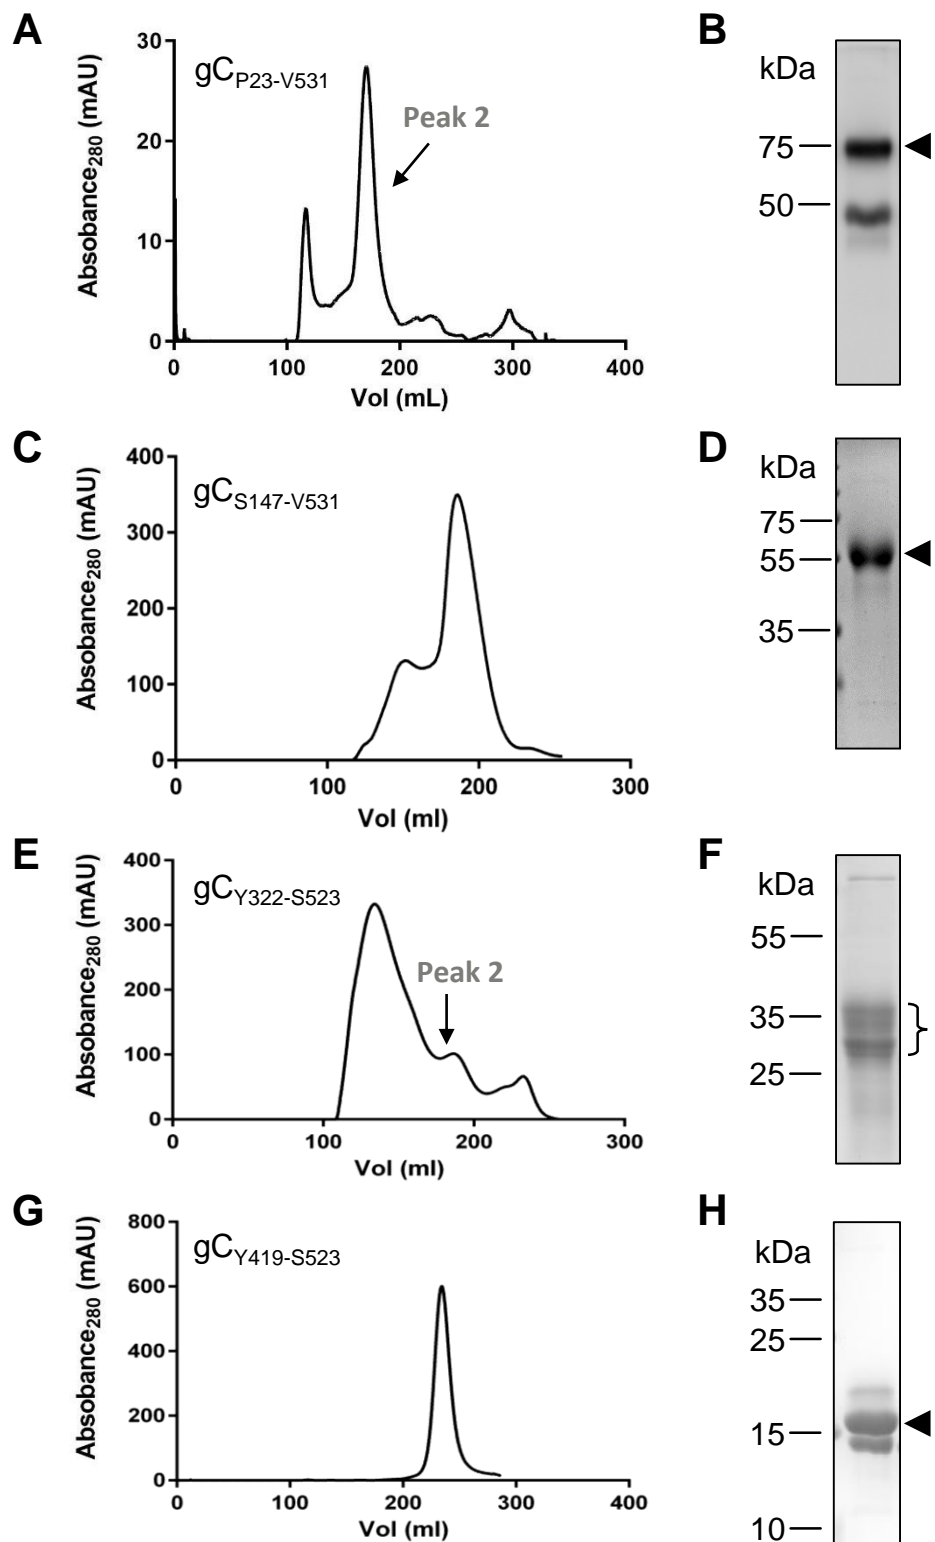

# Supplementary Figure 2

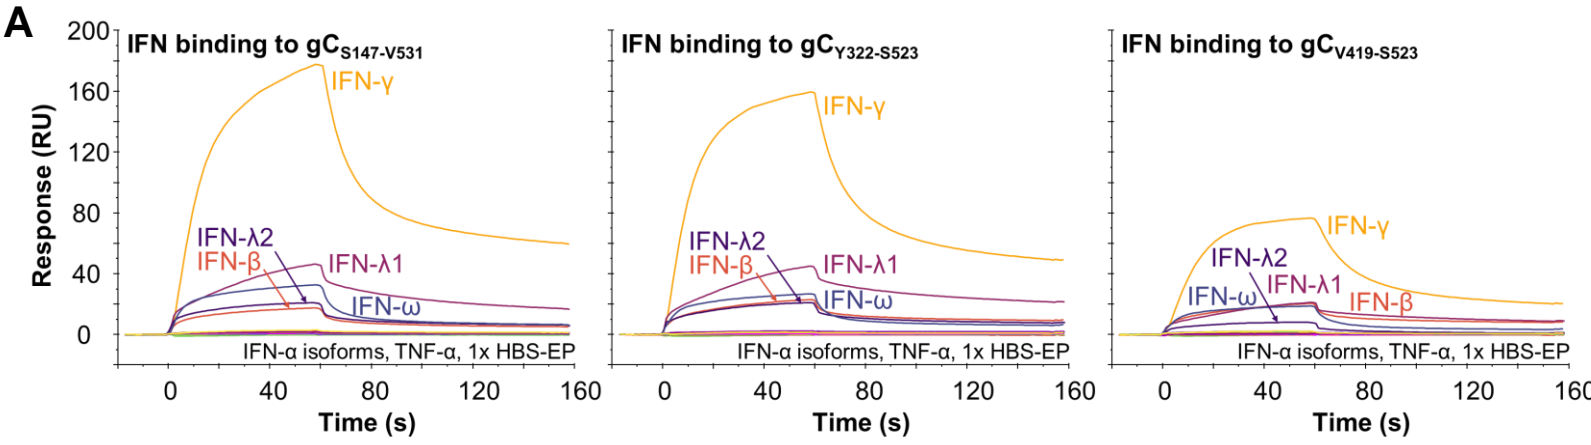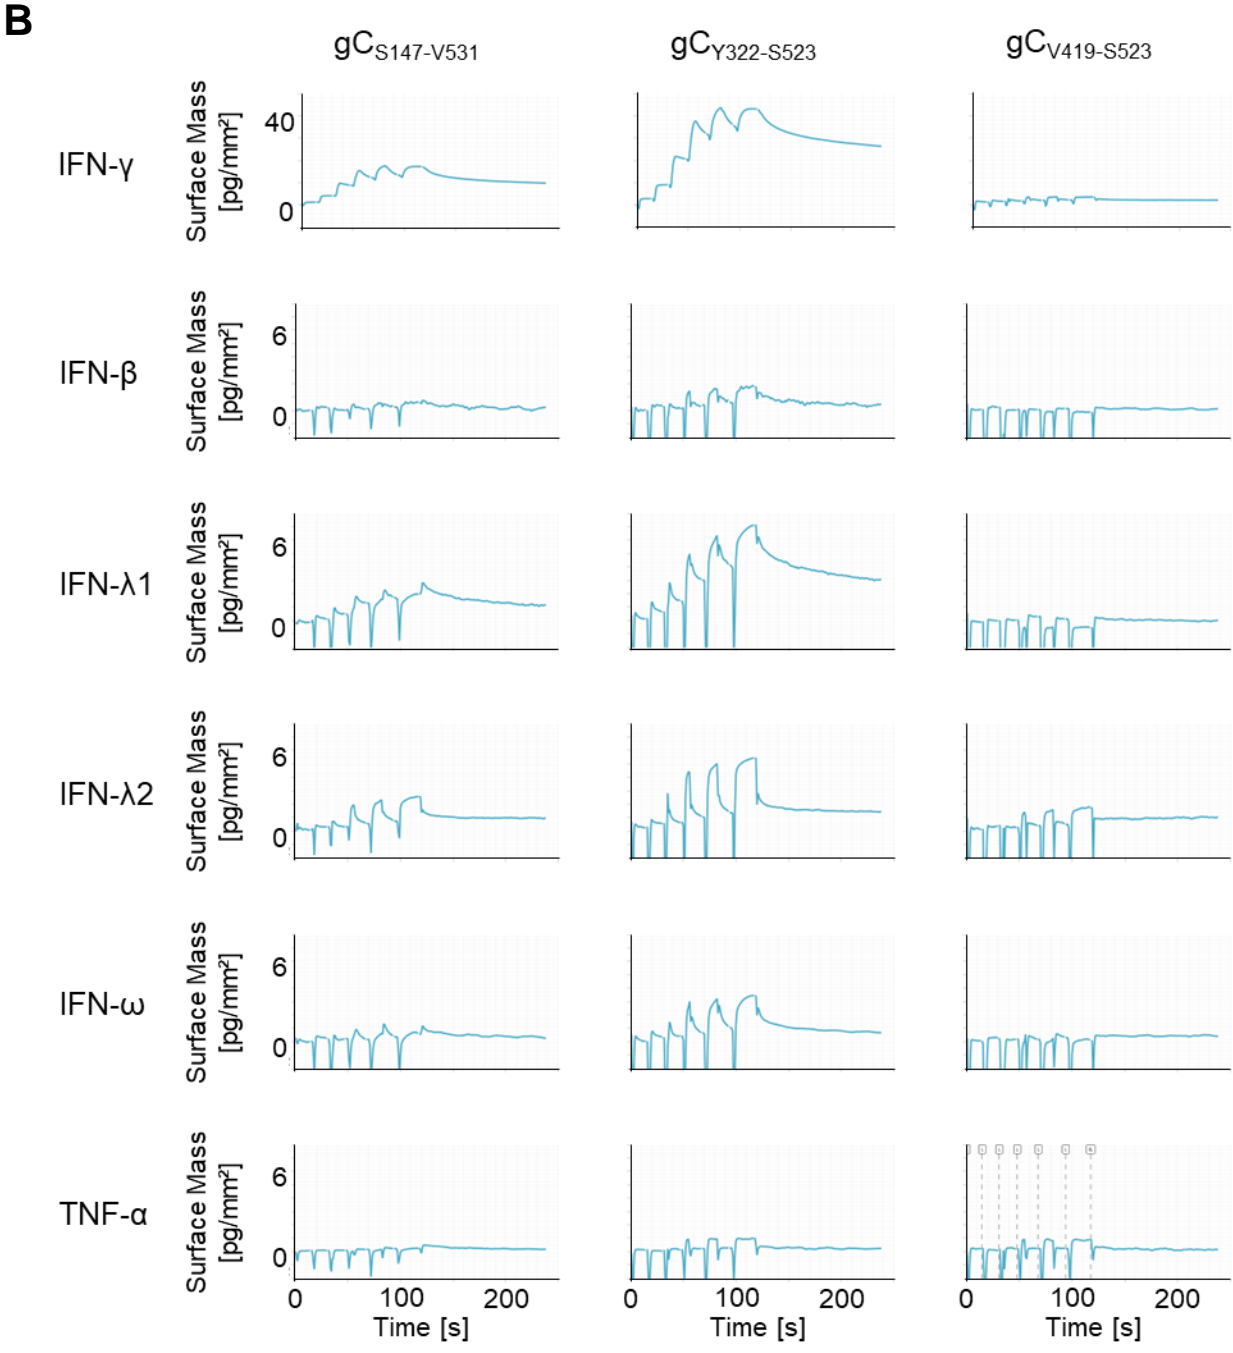

# Supplementary Figure 3

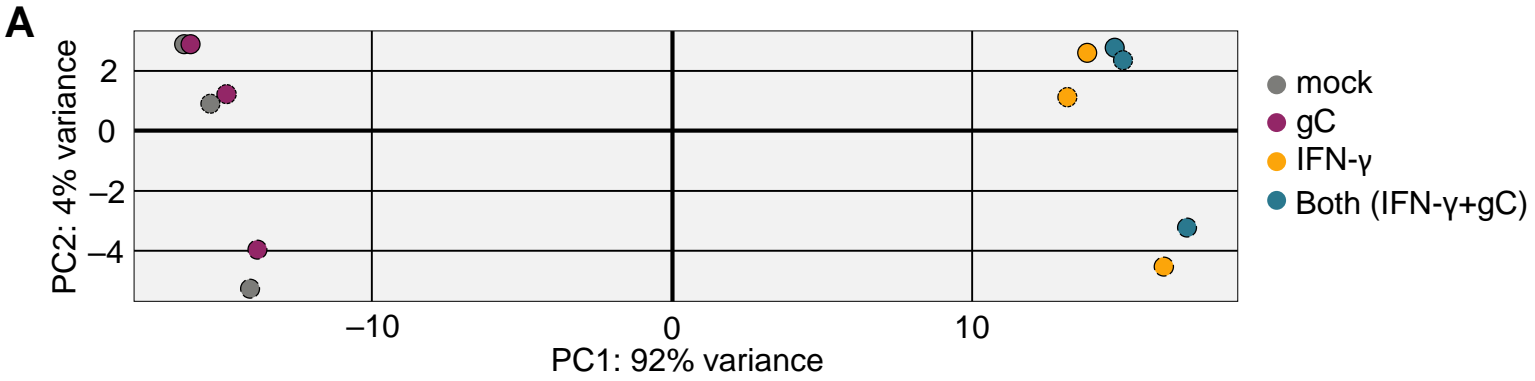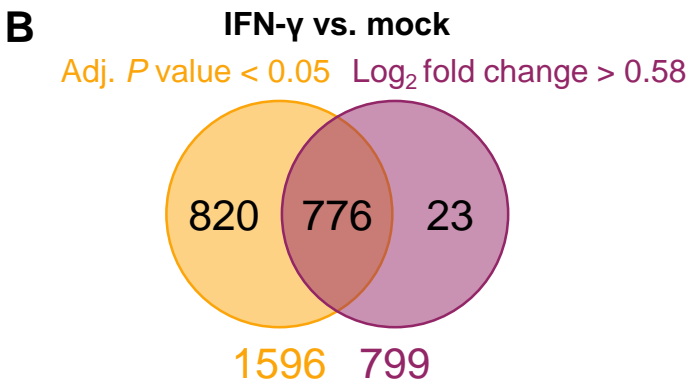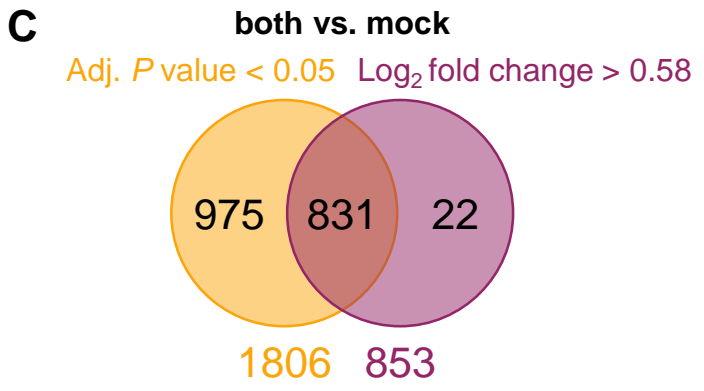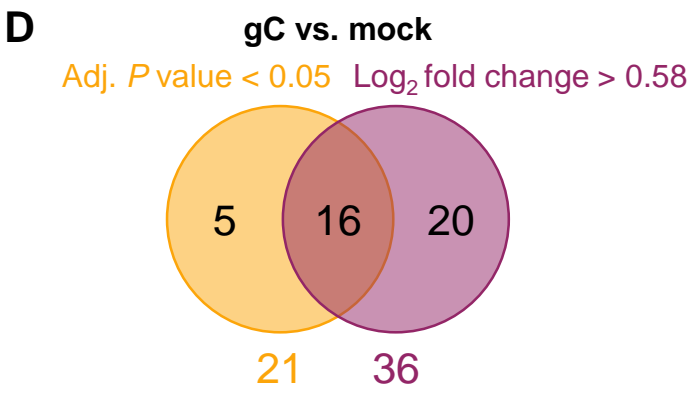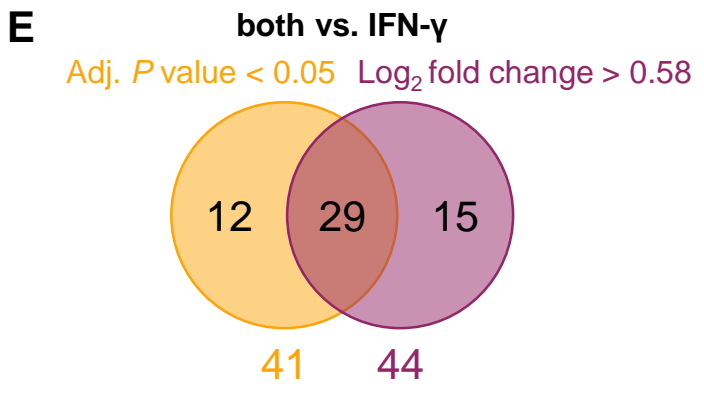

# Supplementary Figure 4

**A**

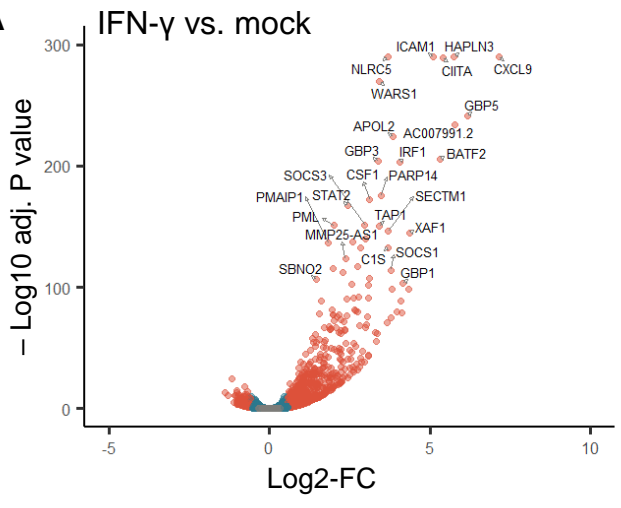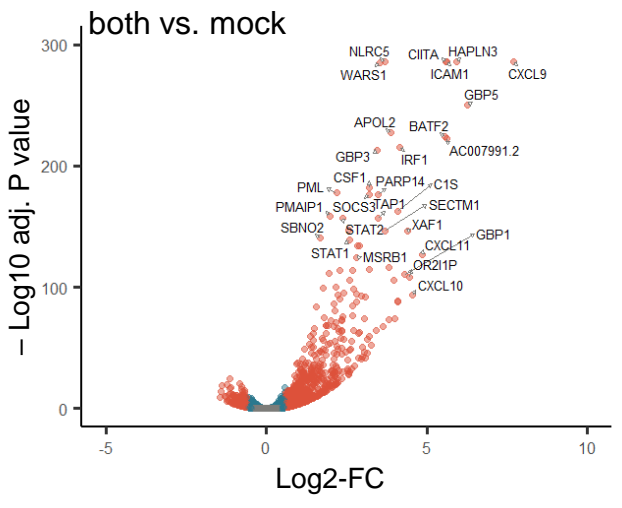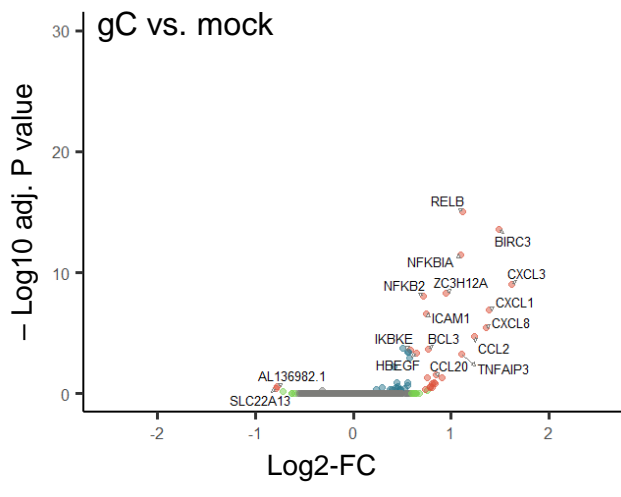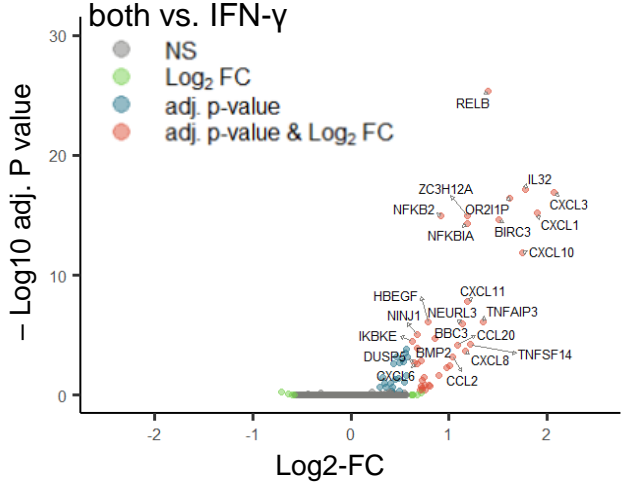

**B**

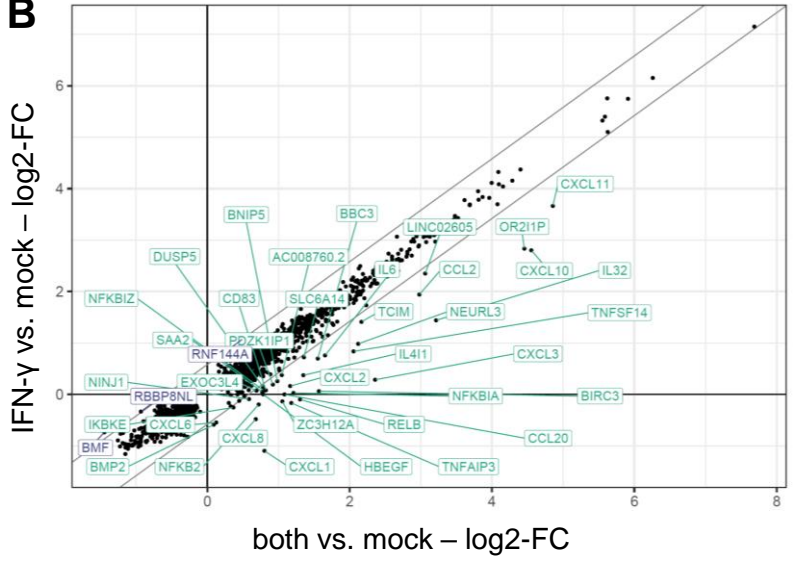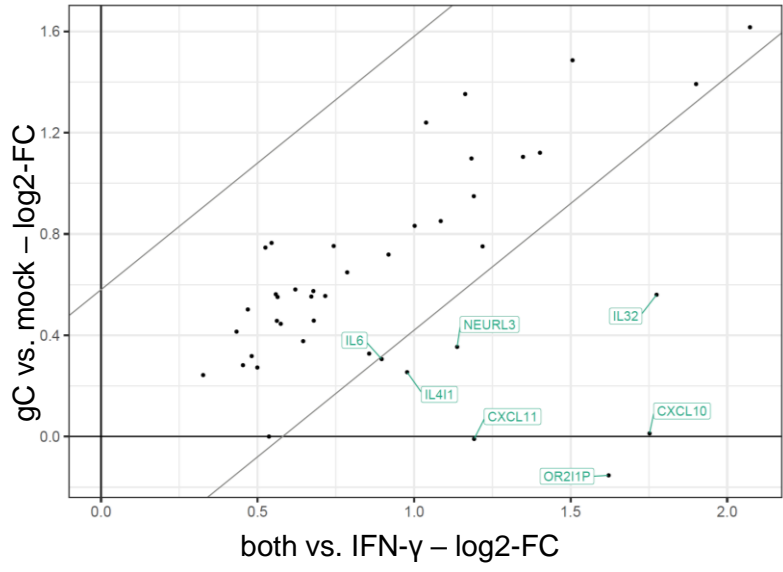

# Supplementary Figure 5

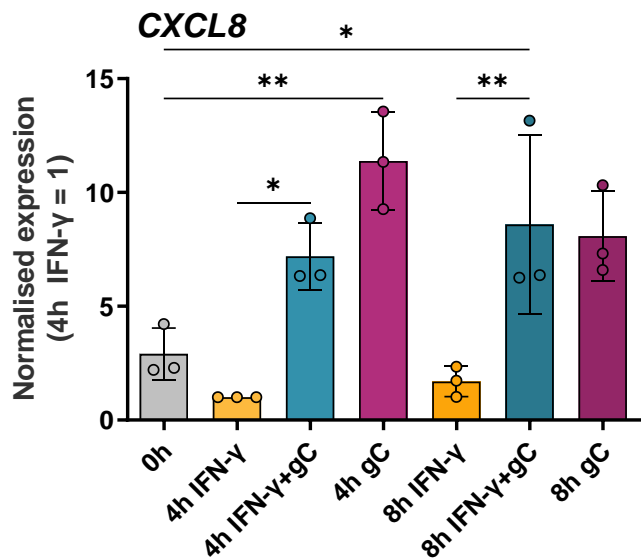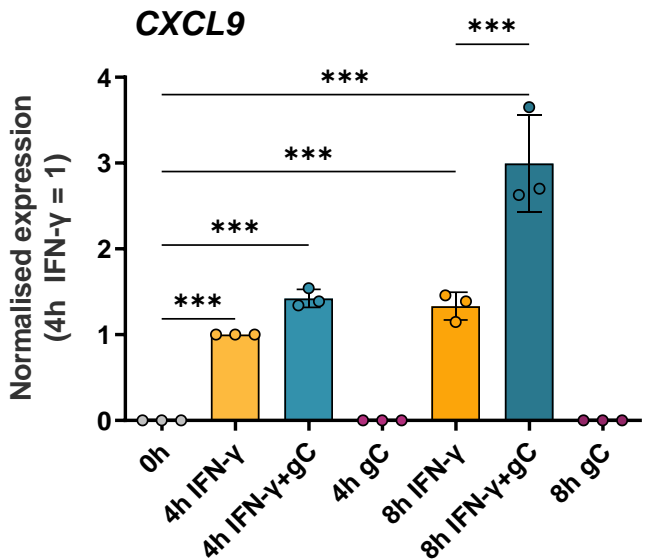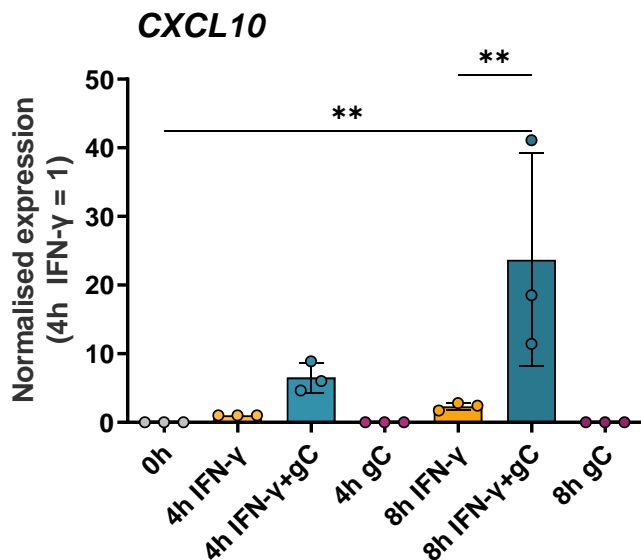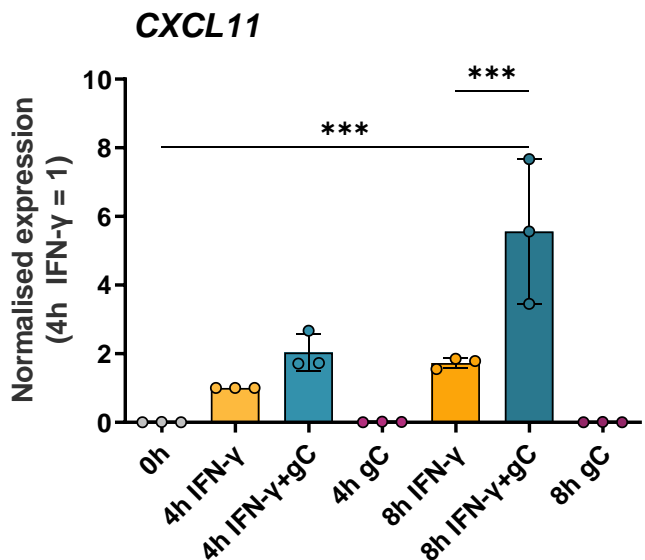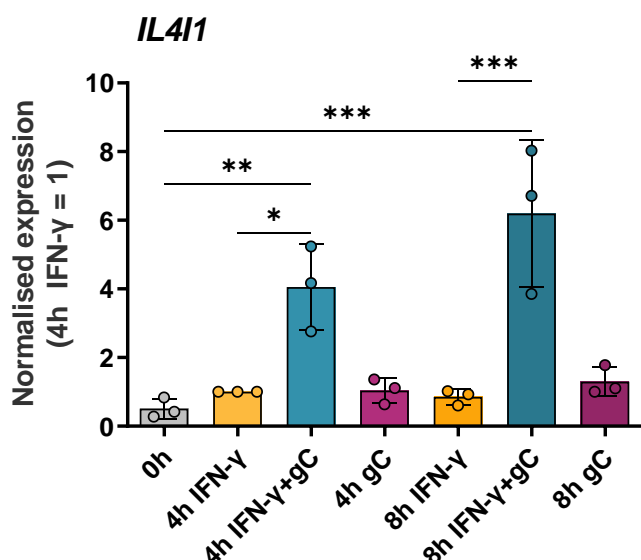

# Supplementary Figure 6

## A ICAM1 mRNA expression levels

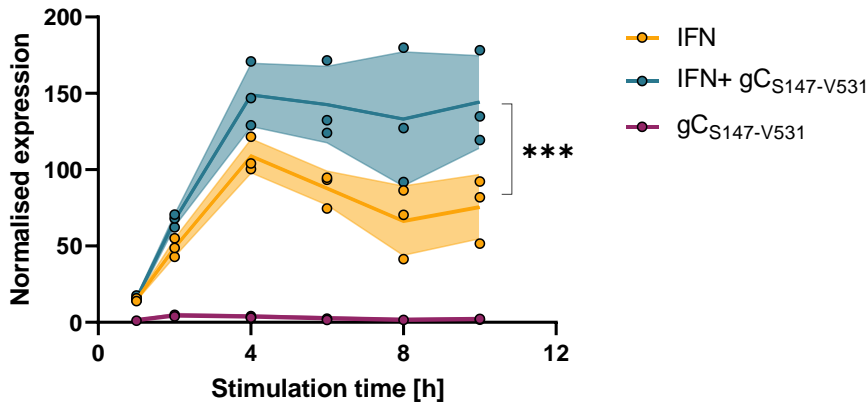

## ICAM1 mRNA expression levels

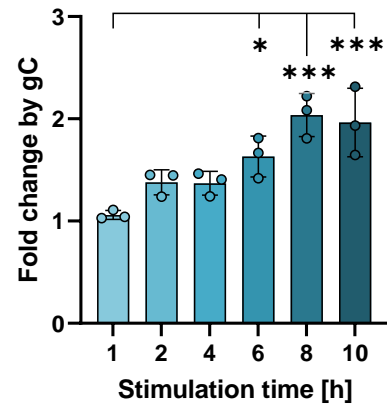

## B

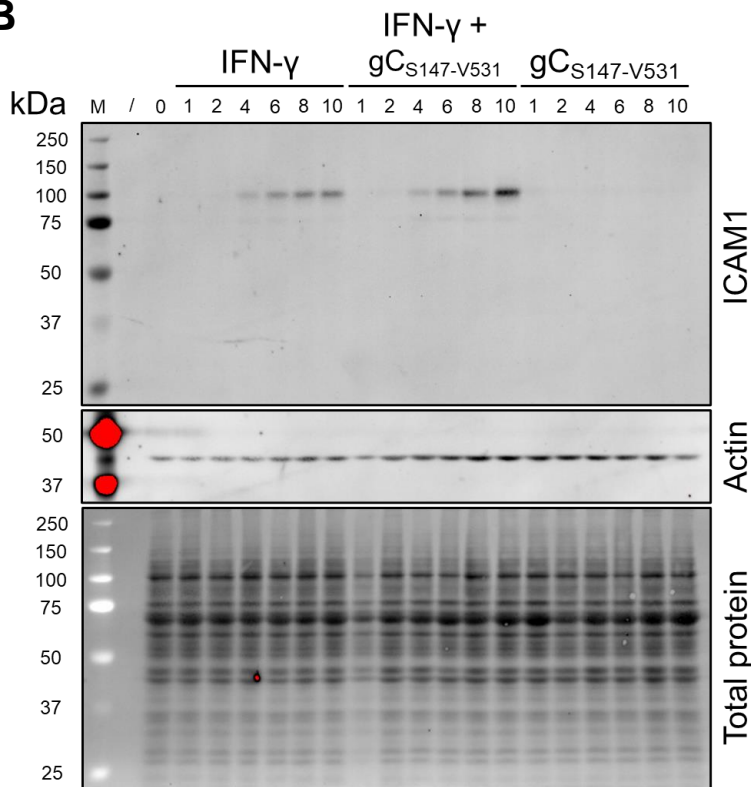

## ICAM1 protein normalised to actin

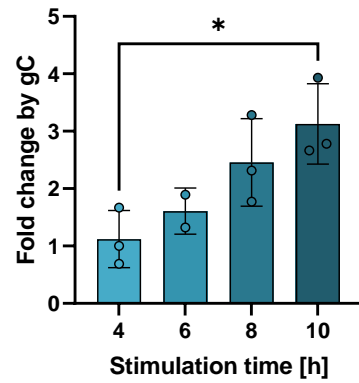

## ICAM1 protein normalised to total protein

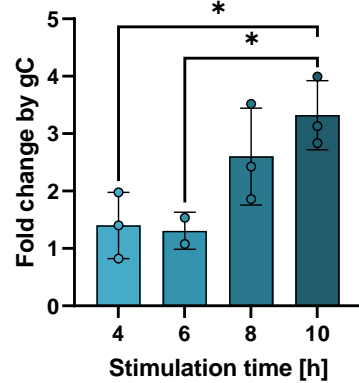

# Supplementary Figure 7

**A**

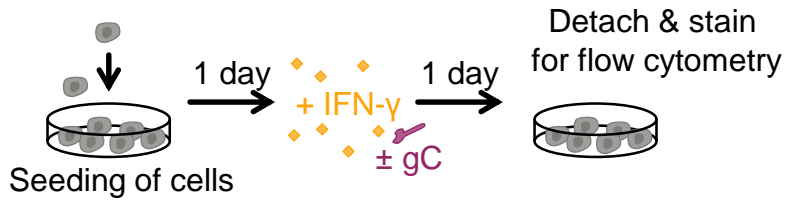

**B**

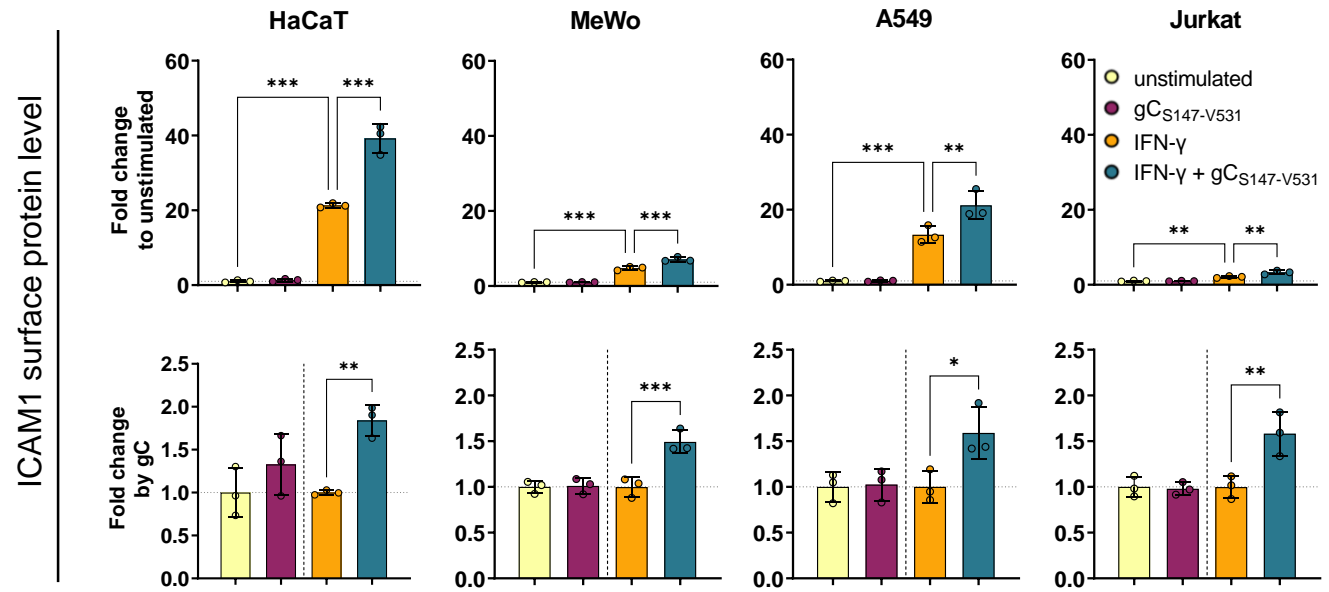

**C**

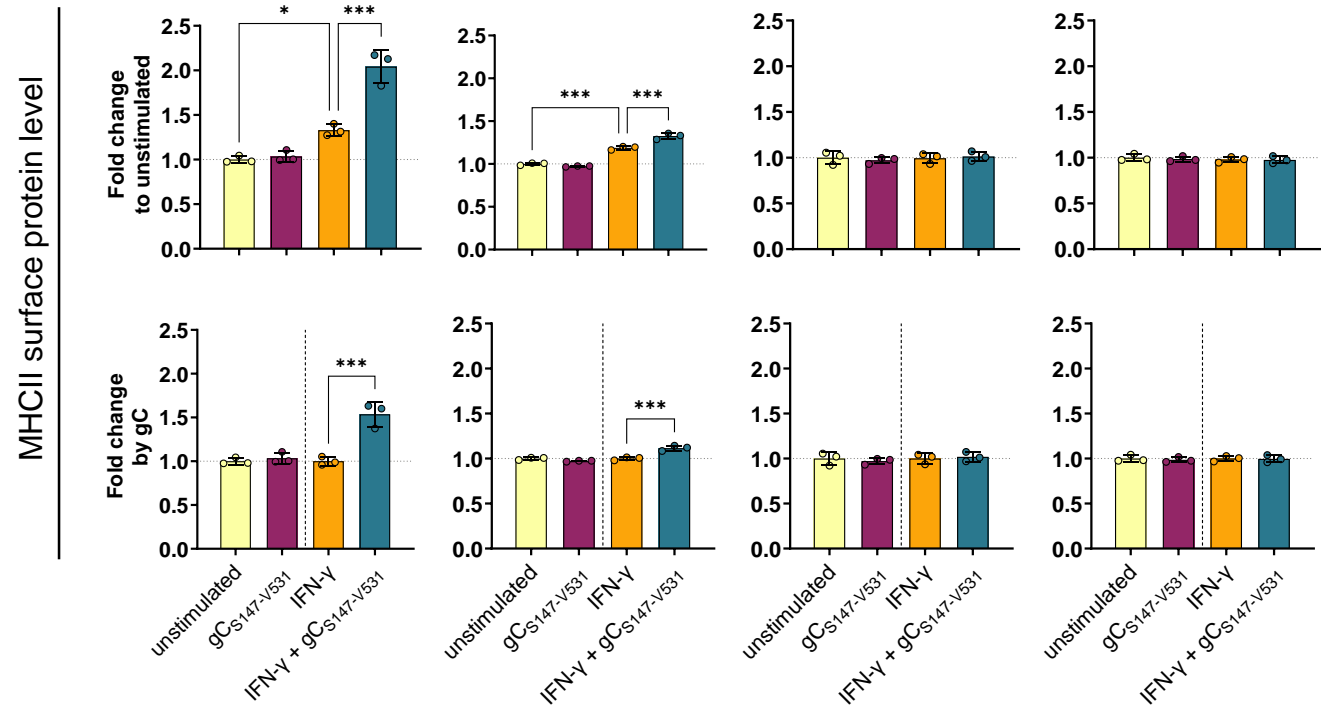

# Supplementary Figure 8

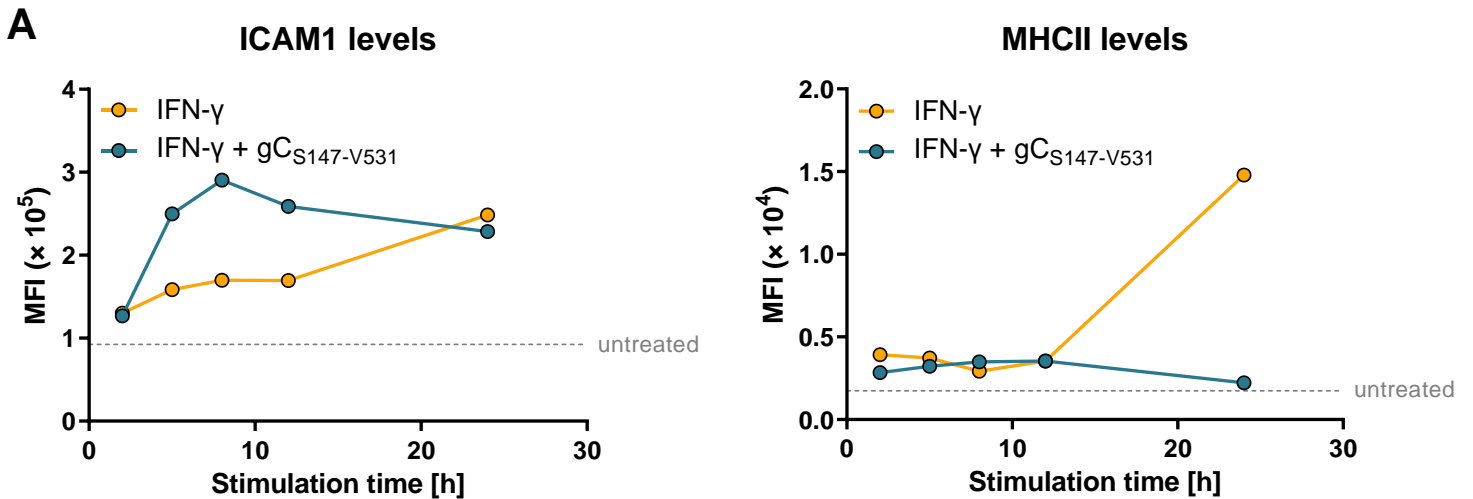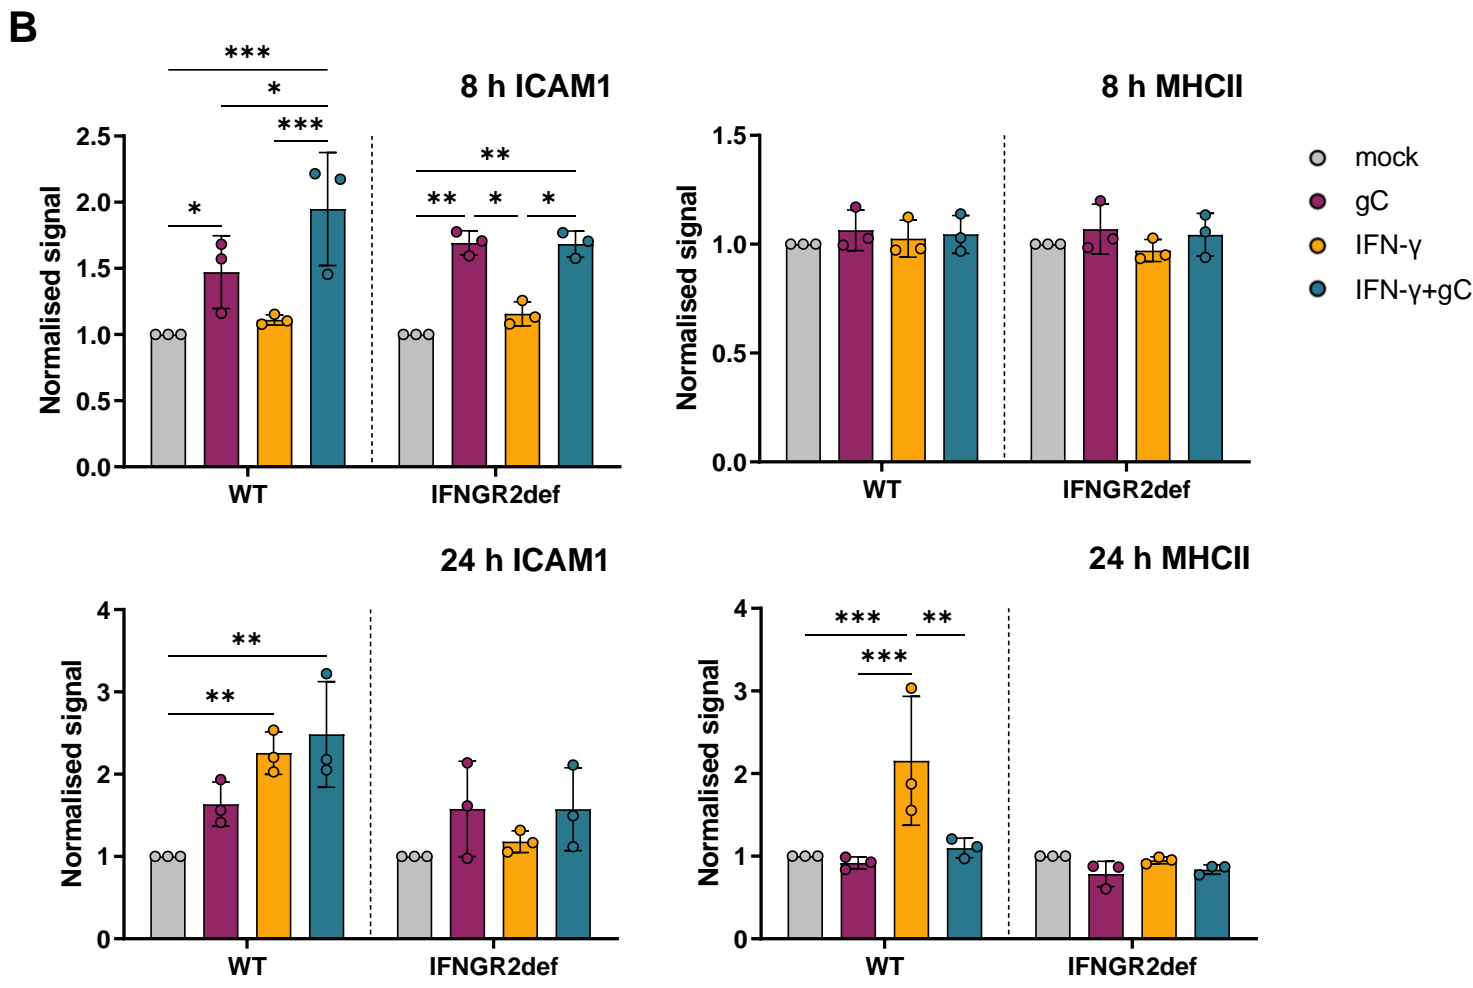



# Supplementary Figure 9

**A**

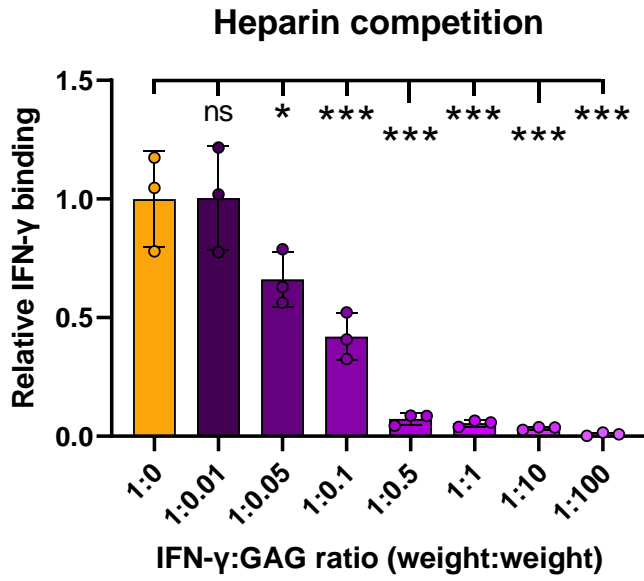

**B**

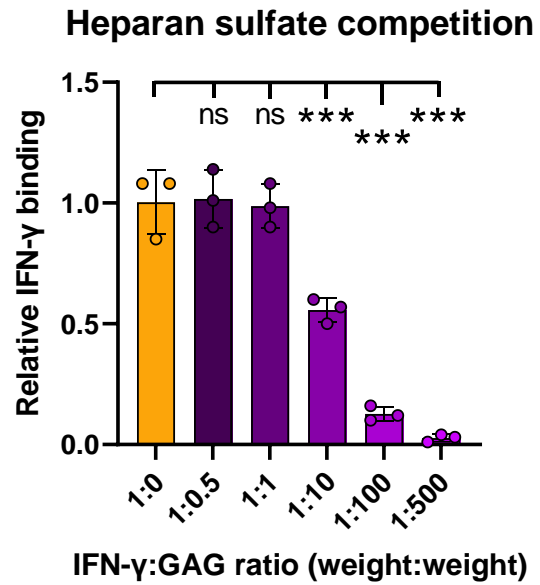

**C**

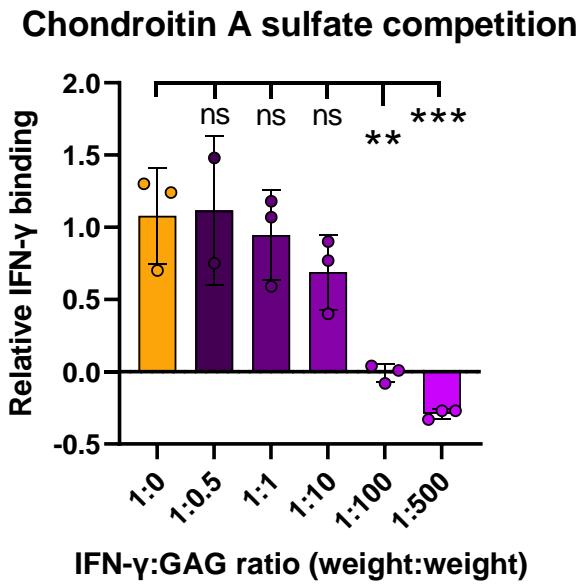

**D**

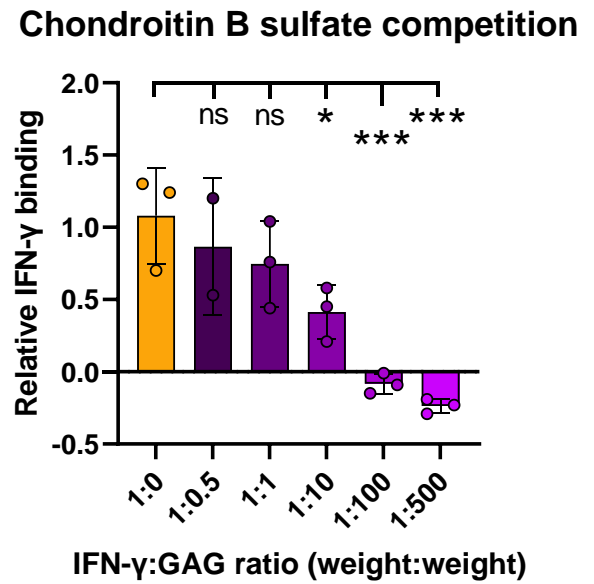

# Supplementary Figure 10

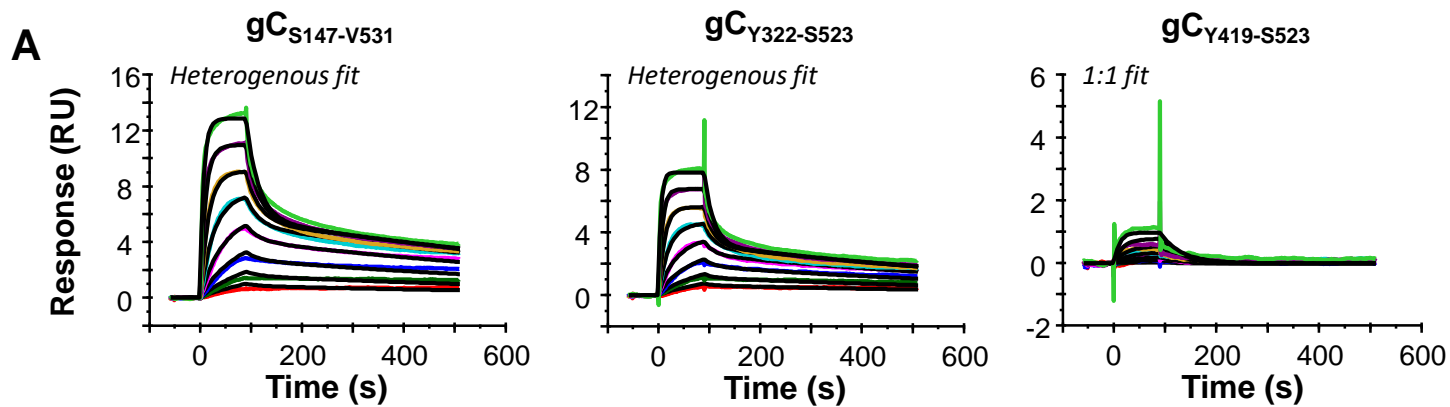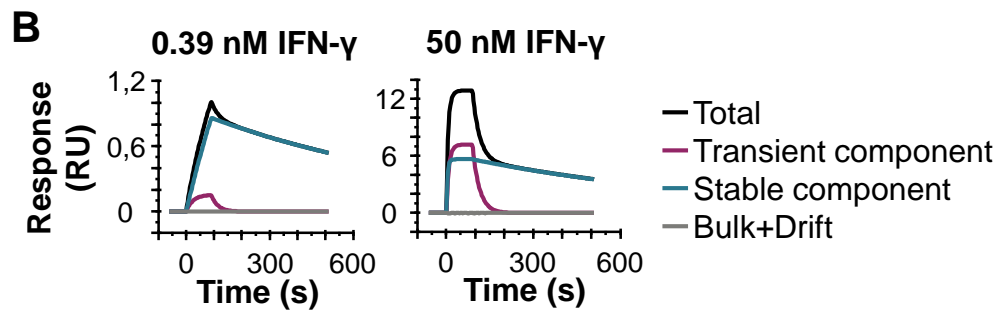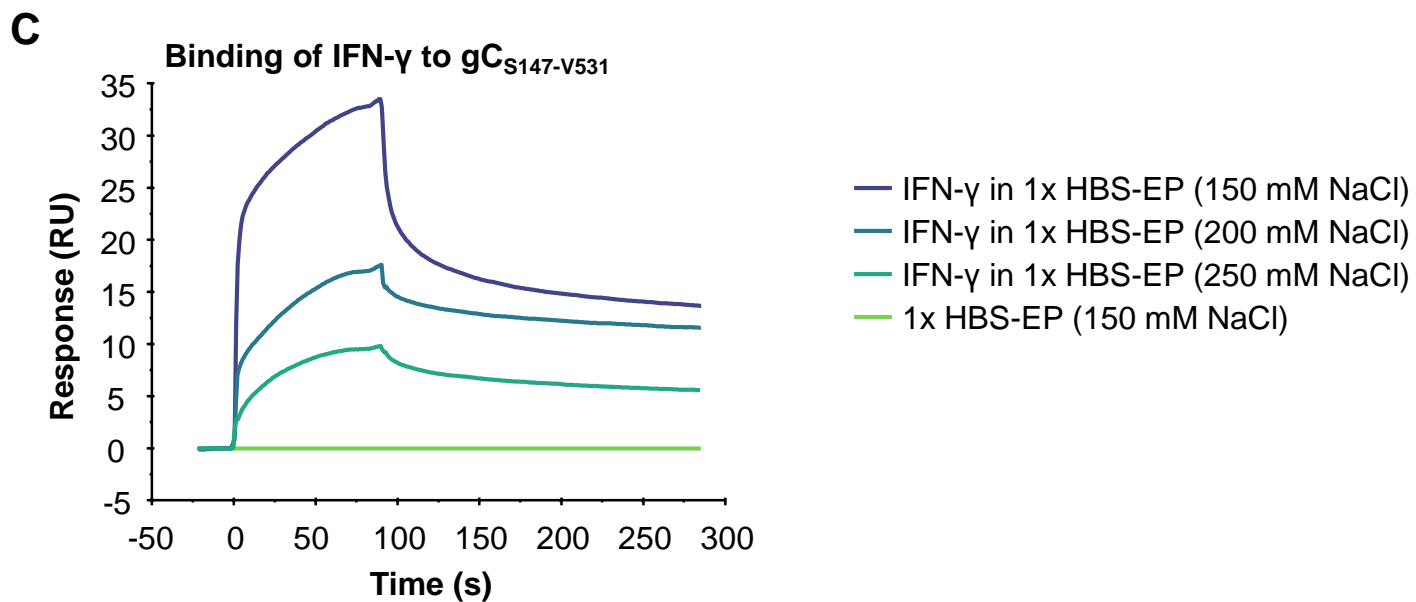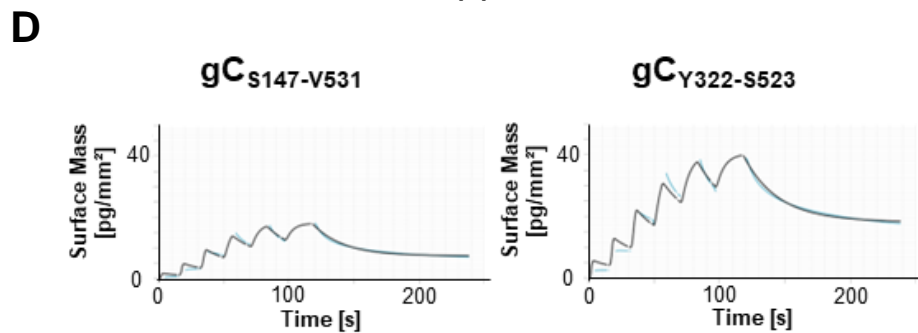

# Supplementary Figure 11

**A**

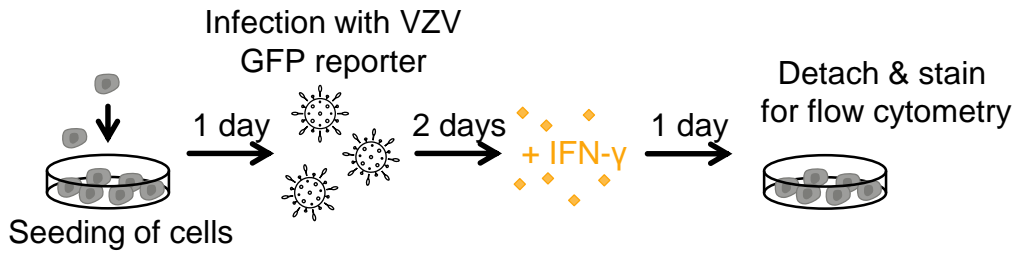

**B**

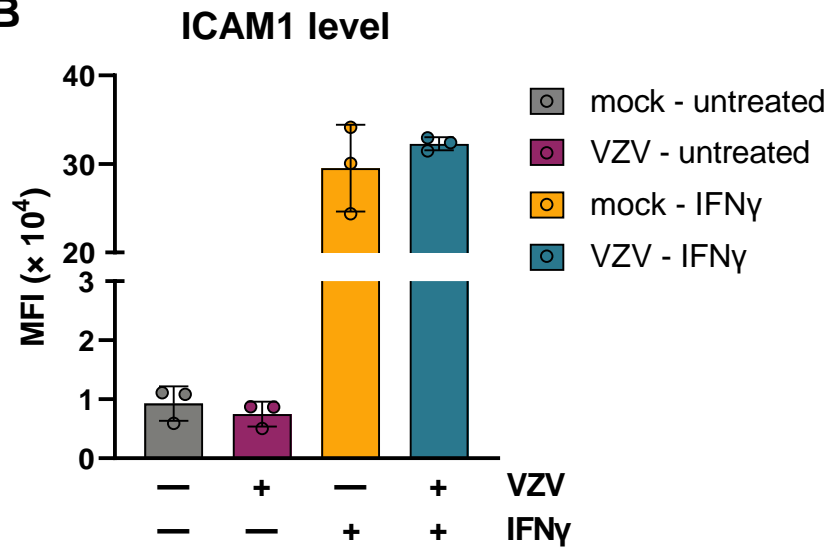

**C**

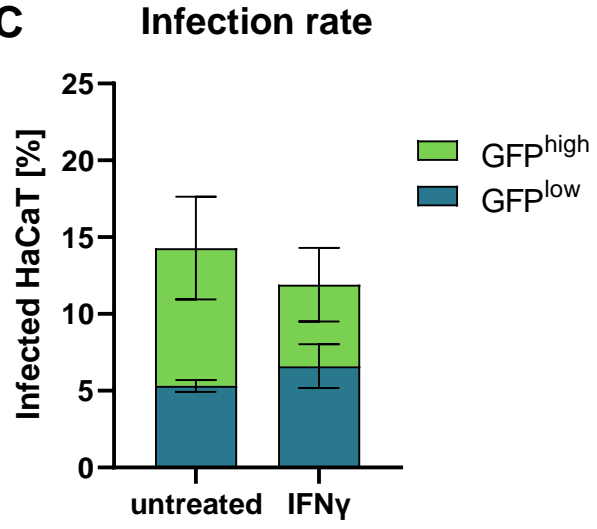

**D**

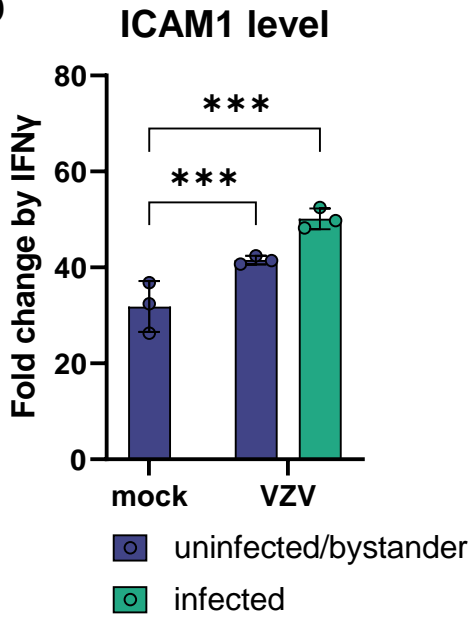

**E**

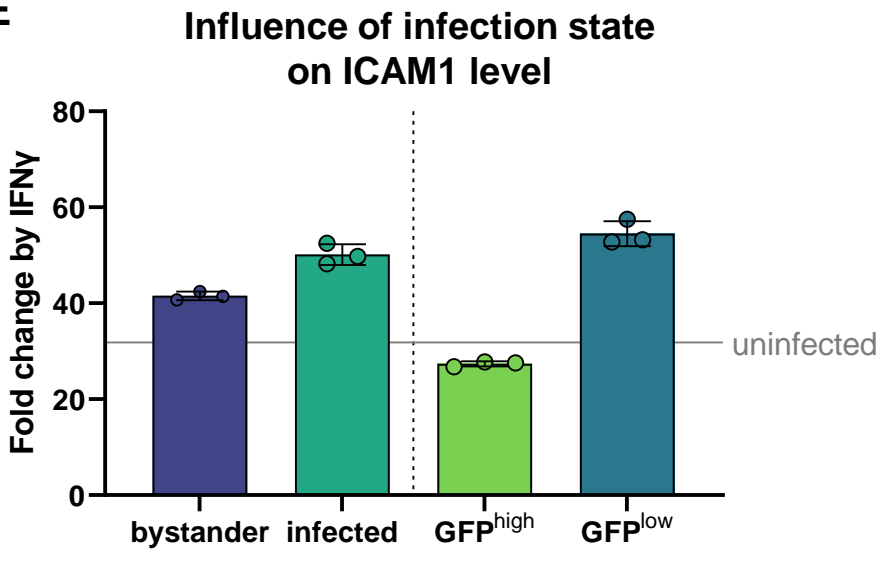

# Supplementary Figure 12

**A**

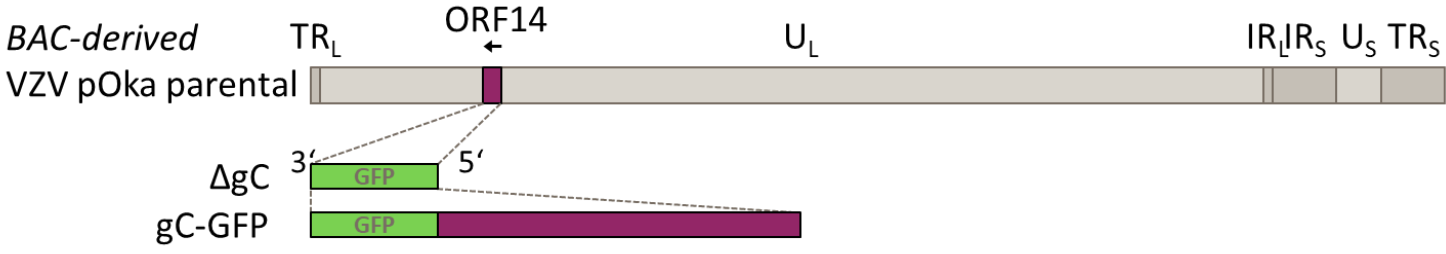

**B**

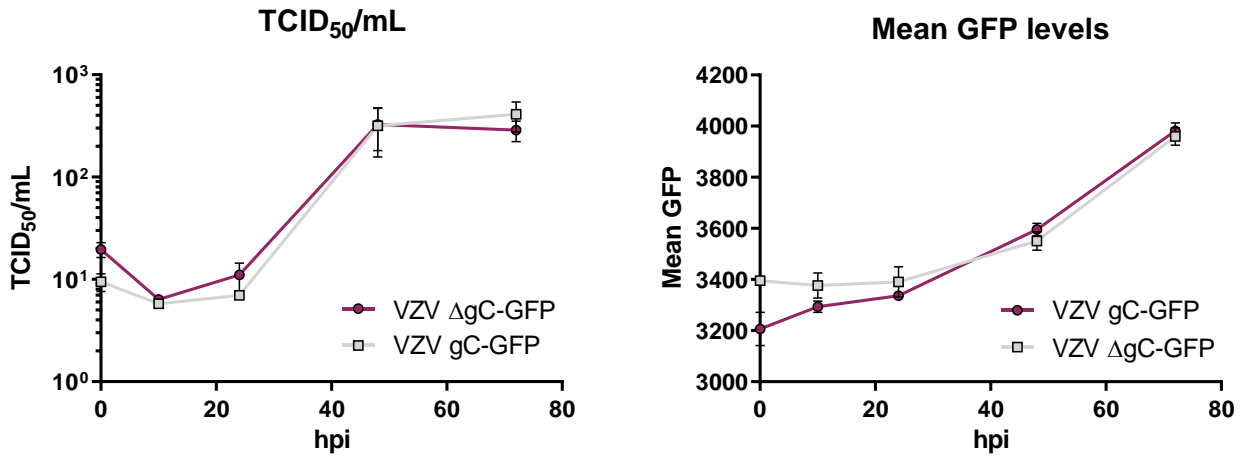

Supplement: media-1.pdf [file media-1.pdf]
