# Supplementary material for: Viral modulation of type II interferon increases T cell adhesion and virus spread
Source: PubMed Central journal article supplement — bioRxiv. 2023 May 26:2023.05.26.542397. Preprint. [Version 1] doi: 10.1101/2023.05.26.542397 (PMC10246016; doi:10.1101/2023.05.26.542397), 2023-05-26
Supplement: media-2.pdf [file media-2.pdf]

## Supplementary Table 1

|                               | Model                | Ka1<br>(1/Ms) | SE(ka1)<br>(1/Ms) | Kd1<br>(1/s) | SE(kd1)<br>(1/s) | KD1<br>(M) | Ka2<br>(1/Ms) | SE(ka2)<br>(1/Ms) | Kd2<br>(1/s) | SE(kd2)<br>(1/s) | KD2<br>(M) |
|-------------------------------|----------------------|---------------|-------------------|--------------|------------------|------------|---------------|-------------------|--------------|------------------|------------|
| <b>gC<sub>S147-V531</sub></b> | Heterogeneous Ligand | 1,51E+06      | 7,76E+03          | 4,14E-02     | 1,39E-04         | 2,75E-08   | 4,93E+06      | 7,14E+03          | 1,11E-03     | 3,90E-06         | 2,26E-10   |
| <b>gC<sub>Y322-S523</sub></b> | Heterogeneous Ligand | 2,61E+06      | 1,50E+04          | 5,58E-02     | 2,35E-04         | 2,13E-08   | 6,47E+06      | 1,29E+04          | 1,33E-03     | 4,89E-06         | 2,05E-10   |
| <b>gC<sub>Y419-S523</sub></b> | 1:1 Binding          | 1,35E+06      | 1,88E+04          | 2,44E-02     | 1,77E-04         | 1,80E-08   | n.a.          | n.a.              | n.a.         | n.a.             | n.a.       |

### Suppl. Table 1

Table showing exemplarily kinetic values for the VZV gC – IFN- $\gamma$  interaction obtained from at least two kinetic assays performed using the Biacore S200. Abbreviations: s = seconds, M = molar (mol/L), Ka = association rate constant, Kd = dissociation rate constant, KD = equilibrium dissociation constant, SE = standard error.

## Supplementary Table 2

|                               | Model                | Ka1<br>(1/Ms) | Kd1<br>(1/s) | KD1<br>(M) | Ka2<br>(1/Ms) | Kd2<br>(1/s) | KD2<br>(M) |
|-------------------------------|----------------------|---------------|--------------|------------|---------------|--------------|------------|
| <b>gC<sub>S147-V531</sub></b> | Heterogeneous Ligand | 7,17E+05      | 4,29E-02     | 5,98E-08   | 8,06E+05      | 1,57E-05     | 1,95E-11   |
| <b>gC<sub>Y322-S523</sub></b> | Heterogeneous Ligand | 6,18E+05      | 3,91E-02     | 6,33E-08   | 6,84E+05      | 3,28E-04     | 4,80E-10   |

### Suppl. Table 2

Table showing exemplarily kinetic values for the VZV gC – IFN- $\gamma$  interaction obtained from at three kinetic assays performed using the Creoptix WAVE systems. Abbreviations: s = seconds, M = molar (mol/L), Ka = association rate constant, Kd = dissociation rate constant, KD = equilibrium dissociation constant.
