# Supplementary material for: Viral modulation of type II interferon increases T cell adhesion and virus spread
Source: PubMed Central journal article supplement — bioRxiv. 2023 May 26:2023.05.26.542397. Preprint. [Version 1] doi: 10.1101/2023.05.26.542397 (PMC10246016; doi:10.1101/2023.05.26.542397), 2023-05-26
Supplement: media-4.pdf [file media-4.pdf]

1 **Bacteria**

2 *Escherichia coli* (*E. coli*) DH5 $\alpha$  was grown in LB medium shaking at 200 – 220 rpm or  
3 on LB agar at 37 °C. This strain was used for general cloning purposes. The VZV BAC-  
4 containing *E. coli* strain GS1783 was cultured in LB medium containing 17  $\mu$ g/mL  
5 chloramphenicol shaking at 200-220 rpm or on LB agar containing 17  $\mu$ g/mL  
6 chloramphenicol at 30-32 °C.

7

8 **Cell culture**

9 A549 is an epithelial cell line isolated from lung tissue of a caucasian male with lung  
10 cancer and was provided by Thomas Pietschmann (Twincore, Hannover, Germany).  
11 HaCaT cells are *in vitro* spontaneously transformed keratinocytes derived from  
12 histologically normal skin from a caucasian male. These cells were provided by Beate  
13 Sodeik (Institute of Virology, MHH, Germany). Jurkat E6.1 originate from a male patient  
14 with acute T cell leukemia and were kindly provided by Martin Messerle (Institute of  
15 Virology, MHH, Germany). Jurkat LFA-1 KO cells were a gift from Carsten Münk  
16 (Düsseldorf University Hospital, Germany) and have been described previously<sup>1</sup>.  
17 MeWo cells are derived from a male patient suffering malignant melanoma and were  
18 purchased from ATCC (HTB-65<sup>TM</sup>). Peripheral blood mononuclear cells (PBMCs) from  
19 anonymised healthy blood donors were isolated using standard Ficoll-density  
20 centrifugation methods. Isolated PBMCs were washed twice, and remaining  
21 erythrocytes were lysed with ACK lysing buffer (Lonza). The PBMCs were frozen in  
22 90% FBS and 10% DMSO and freshly thawed before experiments.

23 All mammalian cells were cultured at 37 °C with 5% CO<sub>2</sub> in a humidified incubator.  
24 A549, HaCaT and Mewo cells were cultured in DMEM (Gibco<sup>TM</sup> #41966-052),  
25 supplemented with 8% heat-inactivated FBS (Sigma #F7524), 1 $\times$  L-glutamine  
26 (Cytogen #04-80100) and 1 $\times$  penicillin/streptomycin (Cytogen #06-07100). Jurkat E6.1

27 and Jurkat LFA-KO cells were cultured in RPMI1640 (Gibco™ #21875-034),  
28 supplemented with 8% heat-inactivated FBS, 1× L-glutamine and 1×  
29 penicillin/streptomycin, with the addition of 2 µg/mL puromycin (Invivogen #ant-pr) for  
30 the Jurkat LFA-KO cells. PBMCs were maintained in RPMI1640 supplemented with  
31 10% heat-inactivated FBS, 1× L-glutamine, 1× sodium pyruvate (Gibco™ #11360-070)  
32 and 1× penicillin/streptomycin.

33 Schneider's *Drosophila melanogaster* Line 2 (S2) cells (ATCC No.: CRL-1963) are  
34 derived from embryonic tissue of the fruit fly *Drosophila melanogaster* and were used  
35 for protein production after stable transfection. The cell line was purchased from  
36 Thermo Scientific. These cells were grown in Schneider's *Drosophila* medium (Gibco)  
37 supplemented with heat-inactivated 10% FBS and 1× penicillin/streptomycin (Gibco)  
38 at 28 °C with normal atmospheric conditions in a semi-adherent manner for  
39 maintenance and transfection. After transfection, 8 µg/mL puromycin was added to the  
40 media for selection during maintenance. For protein production, this semi-adherent cell  
41 line was grown in suspension by shaking at 70 rpm in baffled Erlenmeyer flasks using  
42 Insect XPRESS medium (Lonza).

43 For the generation of healthy iPSC-derived macrophages, both hCD34iPSC16  
44 (MHHi015-A: <https://hpscereg.eu/cell-line/MHHi015-A>) (for the experiments depicted in  
45 the Supplementary Figure 10 A) or the GMP research grade LiPSC-GR1.1 iPSC line  
46 (GMP-grade, Lonza, Basel, Switzerland) (for the experiments depicted in the  
47 Supplementary Figure 10B) were used. The patient-specific iPSC line derived from a  
48 patient harbouring the *IFNGR2* c.705C>A mutation (citation: 10.3390/cells9020483)  
49 was used for the generation of the IFNGR2-deficient macrophages. iPSC-derived  
50 macrophages were generated as described previously<sup>2,3</sup>. Briefly, upon expansion of  
51 the iPSC cells, bFGF was omitted from the culture medium and embryoid bodies (Ebs)  
52 were formed on an orbital shaker at 80 rpm. On day 5, the properly developed Ebs

53 were selected and transferred into an adherent 6-well plate with differentiation medium  
54 (X-vivo; Lonza) supplemented with 1% penicillin/streptomycin, 1 mM L-glutamine, 0.05  
55 mM  $\beta$ -mercaptoethanol, 50 ng/mL M-CSF (Peprotech), and 25 ng/mL IL-3 (Peprotech).  
56 In case of feeder-free iPSC culture conditions, the protocol was modified accordingly  
57 <sup>4,5</sup> and to promote hematopoietic differentiation the mesoderm priming medium was  
58 supplemented with the cytokines BMP4, SCF and VEGF. The medium of the  
59 differentiation cultures was replaced once weekly and the generated macrophages  
60 were harvested and terminally differentiated in RPMI medium supplemented with 10  
61 % FCS (Sigma Aldrich), 1 % penicillin/streptomycin and 50 ng/mL M-CSF (Peprotech)  
62 ( $0.1 \times 10^6$  cells/well a 48-well plate).

63

#### 64 **SDS-PAGE and western blot**

65 Protein samples were separated by SDS-PAGE in gels containing 1% TCE<sup>62</sup>. After the  
66 run, gels were transferred into VE-water and imaged after 3× 45 s activation using the  
67 stain-free gel settings at a ChemiDoc™ MP Imaging System. Alternatively, Coomassie  
68 staining was performed to visualize total protein. The proteins were then transferred  
69 onto nitrocellulose membranes (PALL via VWR #66485) and imaged for total protein  
70 in VE-water using the ChemiDoc stain-free settings, and then blocked with 5% milk in  
71 PBS-T (0.1% Tween20) for 1 h at RT. Subsequently, primary antibodies (anti-ICAM1,  
72 Cell Signalling Technologies #4915S and anti- $\beta$ -actin, Thermo Scientific #MA 1-140)  
73 in 5% (w/v) milk in DPBS-T were added and incubated overnight at 4 °C. After washing  
74 4 times, the membrane was incubated with secondary antibodies (Goat  $\alpha$ Murine IgG  
75 IRDye680RD, LI-COR #925-68070 and Goat  $\alpha$ Rabbit IgG IRDye800CW, LI-COR  
76 #925-32211) in 2.5% (w/v) milk in DPBS-T for 1 h at RT in the dark. Finally, the  
77 membrane was washed again 3 times with DPBS-T and was transferred into 1× DPBS

78 for imaging at the ChemiDoc™ MP. Quantification was performed using the band and  
79 lane tool of Image Lab™ 6.0.1 software.

80

81 **References:**

- 82 1. Hain, A., Kramer, M., Linka, R.M., Nakhaei-Rad, S., Ahmadian, M.R., Haussinger, D.,  
83 Borkhardt, A., and Munk, C. (2018). IL-2 Inducible Kinase ITK is Critical for HIV-1 Infection of  
84 Jurkat T-cells. *Sci Rep* 8, 3217. 10.1038/s41598-018-21344-7.
- 85 2. Lachmann, N., Ackermann, M., Frenzel, E., Liebhaber, S., Brenig, S., Happle, C., Hoffmann,  
86 D., Klimenkova, O., Luttge, D., Buchegger, T., et al. (2015). Large-scale hematopoietic  
87 differentiation of human induced pluripotent stem cells provides granulocytes or  
88 macrophages for cell replacement therapies. *Stem Cell Reports* 4, 282-296.  
89 10.1016/j.stemcr.2015.01.005.
- 90 3. Ackermann, M., Rafiei Hashtchin, A., Manstein, F., Carvalho Oliveira, M., Kempf, H.,  
91 Zweigerdt, R., and Lachmann, N. (2022). Continuous human iPSC-macrophage mass  
92 production by suspension culture in stirred tank bioreactors. *Nat Protoc* 17, 513-539.  
93 10.1038/s41596-021-00654-7.
- 94 4. Buchrieser, J., James, W., and Moore, M.D. (2017). Human Induced Pluripotent Stem Cell-  
95 Derived Macrophages Share Ontogeny with MYB-Independent Tissue-Resident Macrophages.  
96 *Stem Cell Reports* 8, 334-345. 10.1016/j.stemcr.2016.12.020.
- 97 5. Gutbier, S., Wanke, F., Dahm, N., Rummelin, A., Zimmermann, S., Christensen, K., Kochl, F.,  
98 Rautanen, A., Hatje, K., Geering, B., et al. (2020). Large-Scale Production of Human iPSC-  
99 Derived Macrophages for Drug Screening. *Int J Mol Sci* 21. 10.3390/ijms21134808.

100
